# Supplementary material for: Parents' Views on the Best and Worst Reasons for Guideline-Consistent HPV Vaccination
Source: Oxford University Press journal article supplement (doi:10.1158/1055-9965.epi-17-1067), 2018-06-14
Supplement: 10559965epi171067-sup-192669_2_supp_4658672_p6dnr2.docx [file 10559965epi171067-sup-192669_2_supp_4658672_p6dnr2.docx]

**Supplemental Table 3.** Relative persuasiveness of reasons for HPV vaccination by child’s age.

| Overall |  | 11-12 years | | |  | 13-17 years | | |
| --- | --- | --- | --- | --- | --- | --- | --- | --- |
| Rank | Message | β | SE | Rank |  | β | SE | Rank |
| 1st | Cancer prevention | 2.05 | 0.05 | 1st |  | 2.08 | 0.03 | 1st |
| 2nd | Infection prevention | 0.73 | 0.05 | 2nd |  | 0.66 | 0.03 | 2nd |
| 3rd | Lasting benefits | 0.72 | 0.05 | 3rd |  | 0.64 | 0.03 | 3rd |
| 4th | Safety | 0.42 | 0.04 | 4th |  | 0.40 | 0.03 | 4th |
| 5th | Best age | 0.12 | 0.04 | 5th |  | 0.01 | 0.03 | 6th |
| 6th | Before sex | -0.21 | 0.05 | 6th |  | 0.01 | 0.03 | 5th |
| 7th | Personal endorsement | -0.46 | 0.04 | 7th |  | -0.50 | 0.03 | 7th |
| 8th | Fewer shots | -0.63 | 0.04 | 8th |  | -0.58 | 0.03 | 8th |
| 9th | Scientific breakthrough | -0.68 | 0.04 | 9th |  | -0.67 | 0.03 | 9th |  |
| 10th | My own child | -0.94 | 0.04 | 10th |  | -0.99 | 0.03 | 10th |  |
| 11th | Due for it | -1.13 | 0.04 | 11th |  | -1.06 | 0.03 | 11th |

*Note.* Shading indicates difference from overall ranking.

*Best reasons*
