# Supplementary material for: Parents' Views on the Best and Worst Reasons for Guideline-Consistent HPV Vaccination
Source: Oxford University Press journal article supplement (doi:10.1158/1055-9965.epi-17-1067), 2018-06-14
Supplement: 10559965epi171067-sup-192669_2_supp_4658673_p6dnk2.docx [file 10559965epi171067-sup-192669_2_supp_4658673_p6dnk2.docx]

**Supplemental Table 1.** Relative persuasiveness of reasons for HPV vaccination by child’s HPV vaccination status.

| Overall |  | 0 doses | | |  | 1+ doses | | |
| --- | --- | --- | --- | --- | --- | --- | --- | --- |
| Rank | Message | β | SE | Rank |  | β | SE | Rank |
| 1st | Cancer prevention | 2.08 | 0.04 | 1st |  | 2.07 | 0.03 | 1st |
| 2nd | Infection prevention | 0.81 | 0.04 | 2nd |  | 0.58 | 0.03 | 3rd |
| 3rd | Lasting benefits | 0.72 | 0.04 | 3rd |  | 0.63 | 0.03 | 2nd |
| 4th | Safety | 0.29 | 0.04 | 4th |  | 0.49 | 0.03 | 4th |
| 5th | Best age | 0.05 | 0.04 | 6th |  | 0.03 | 0.03 | 5th |
| 6th | Before sex | 0.05 | 0.04 | 5th |  | -0.12 | 0.03 | 6th |
| 7th | Personal endorsement | -0.59 | 0.04 | 8th |  | -0.40 | 0.03 | 7th |
| 8th | Fewer shots | -0.58 | 0.03 | 7th |  | -0.61 | 0.03 | 8th |
| 9th | Scientific breakthrough | -0.63 | 0.04 | 9th |  | -0.71 | 0.03 | 9th |
| 10th | My own child | -0.95 | 0.04 | 10th |  | -1.00 | 0.03 | 11th |
| 11th | Due for it | -1.24 | 0.03 | 11th |  | -0.96 | 0.03 | 10th |

*Note.* Shading indicates difference from overall ranking.
